# Supplementary material for: Synthesis and Biological Evaluation of Novel Bufalin Derivatives
Source: MDPI journal article supplement (doi:10.3390/ijms23074007), 2022-04-04
Supplement: s1 [file s1]

Supplement 1.

Effect of bufalin, bufalin 2,3-ene and bufalin 3,4-ene on ATPases activity

|                         | Total ATPase             | Na <sup>+</sup> , K <sup>+</sup> -ATPase | Mg <sup>++</sup> -ATPase |
|-------------------------|--------------------------|------------------------------------------|--------------------------|
|                         | μmole Pi/mg Protein/Hour |                                          |                          |
| Control                 | 6.60                     | 5.31                                     | 1.28                     |
| Bufalin (10 μM)         | 6.55                     | 5.08                                     | 1.47                     |
| Bufalin 2,3-ene (10 μM) | 6.11                     | 4.57                                     | 1.54                     |
| Bufalin 3,4-ene (10 μM) | 5.52                     | 4.31                                     | 1.21                     |

ATPases activity of pig microsomal fraction was measured by determining phosphate release from ATP in the presence and absence of ouabain (1 mM), as described in Materials and Methods.
