# Supplementary material for: Synthesis and Biological Evaluation of Novel Bufalin Derivatives
Source: MDPI journal article supplement (doi:10.3390/ijms23074007), 2022-04-04

## Supplement 2.

Effect of bufalin, Compound 1 and Compound 2 on human cancer cells growth. The anti-proliferative activity of the steroid was tested against the NCI-60 cell line panel at the National Cancer Institute (NCI), Bethesda, Maryland, USA applying their standard protocol ([https://dtp.cancer.gov/discovery\\_development/nci-60/methodology.htm](https://dtp.cancer.gov/discovery_development/nci-60/methodology.htm)).

**Figure S1.** Effect of Bufalin on human cancer cell growth.

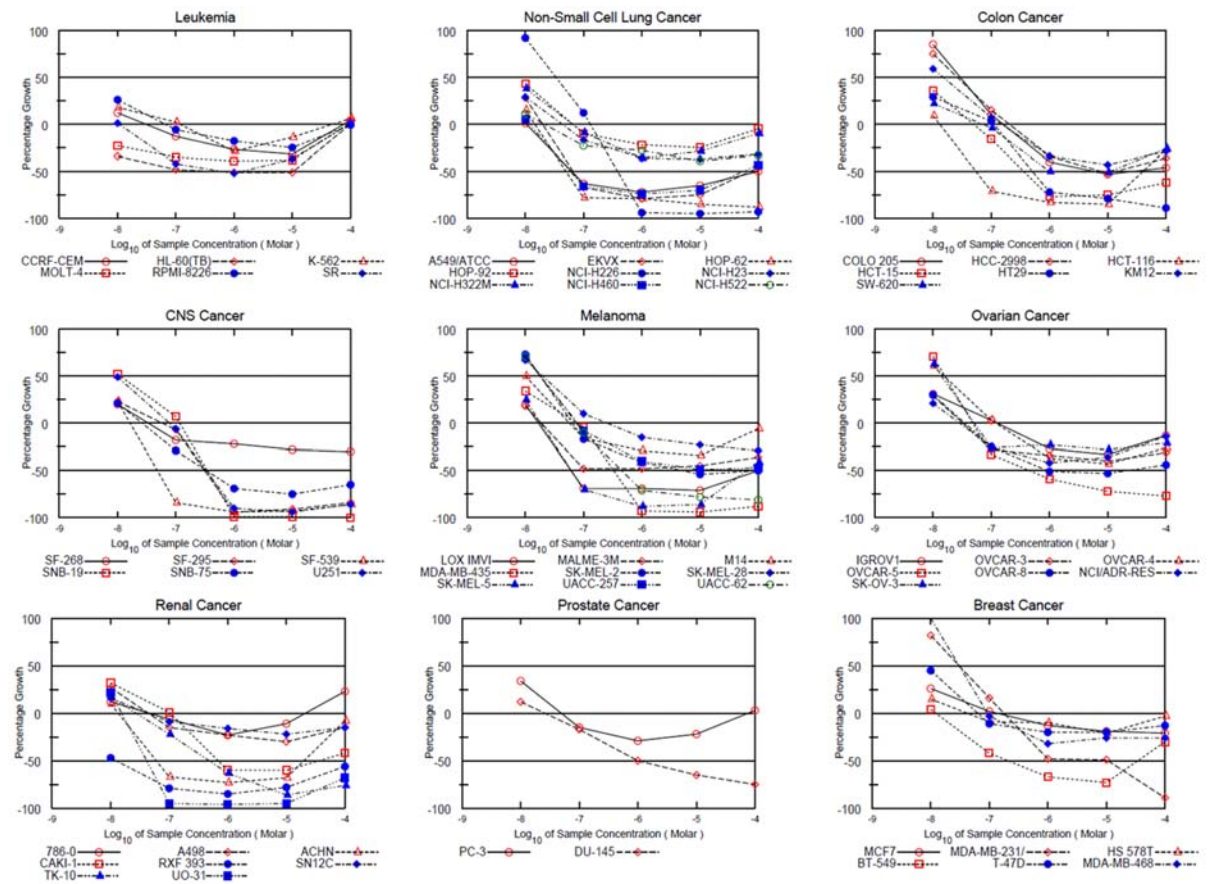

Figure S2. Effect of Compound 1 (Bufalin 2,3-ene) on human cancer cell growth

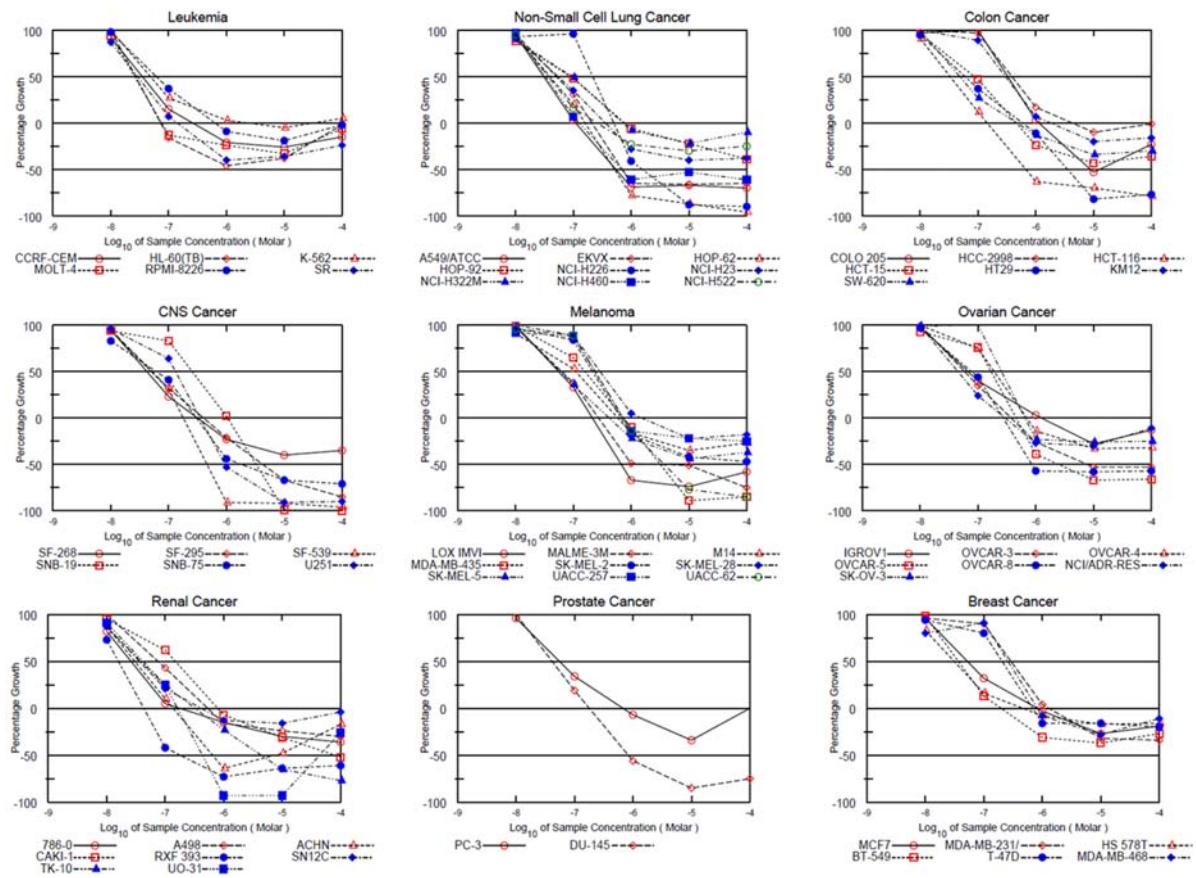

Figure S3. Effect of Compound 2 (Bufalin 3,4-ene) on human cancer cell growth

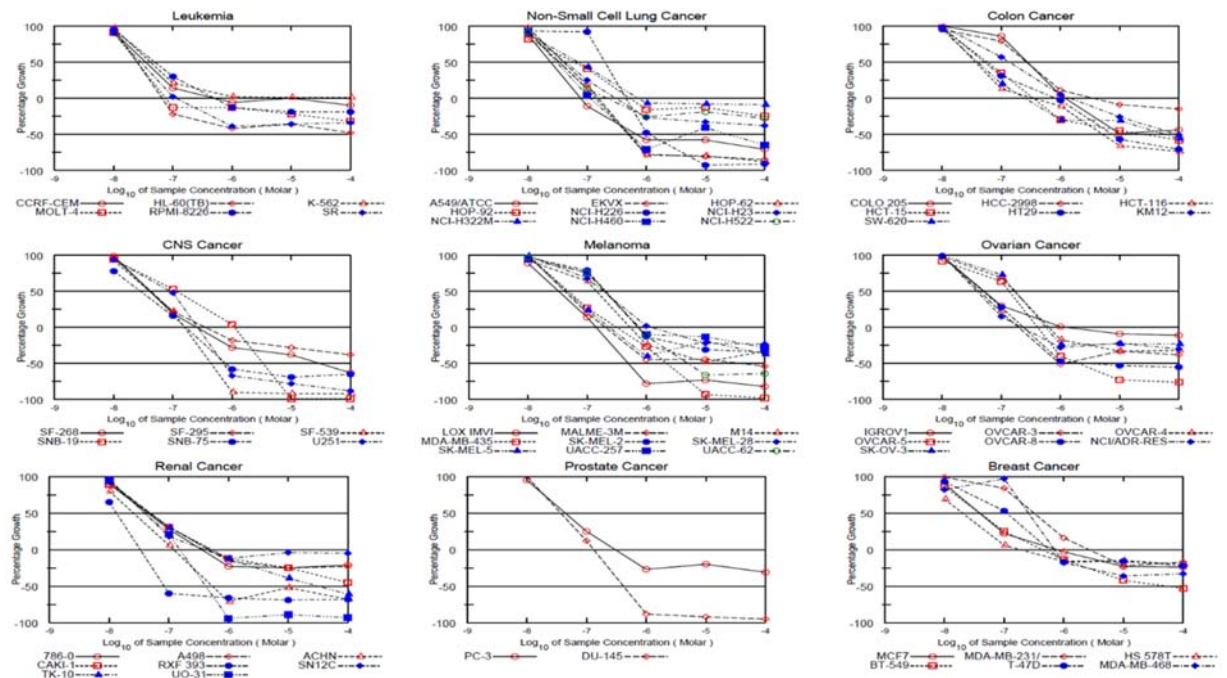

Supplement: s1 [file s1]
